# Supplementary material
Source: publisher figshare collection journal article supplement (https://sage.figshare.com/ndownloader/files/16369589)
Supplement: Supplementary file 1 [file 16369589]

**Appendix: Sexual Assault Vignette**

You are at a house party with your friend, Vicki. Music is playing and people are having a good time. From across the room, you spot your friend, Pete, and decide to introduce Vicki to Pete. You think the two of them might get along well, since both are into similar sports, both have similar views on politics, and both are from similar family backgrounds. After introductions, it is clear Vicki and Pete are getting along well, so you leave the two of them to mingle with other people at the party. You begin talking with a group of people who are discussing your favorite band. An hour later, you notice Vicki drinking several shots of liquor as part of a drinking contest while Pete cheers her on. You ask Pete if he plans to join in the contest, but Pete replies he is just going to stick to his one beer tonight. Later in the evening, you see Pete and Vicki heading to a separate room away from the party. You notice that Vicki is stumbling and having a very hard time walking. As you and a group of people walk by the open door on your way to the back porch, you see Pete and Vicki kissing and making out on the bed. Next, you notice that Pete is unzipping his pants and getting on top of Vicki. Vicki pushes him away, but Pete continues to climb on top of her. You hear Pete say to Vicki, “Come on, stop being such a tease.”
